# Supplementary material for: Network inference from glycoproteomics data reveals new reactions in the IgG glycosylation pathway
Source: PubMed Central journal article supplement (PMC5684356; doi:10.1038/s41467-017-01525-0), 2017-11-14
Supplement: 41467_2017_1525_MOESM3_ESM.pdf [file 41467_2017_1525_MOESM3_ESM.pdf]

## **Description of Supplementary Files**

File name: Supplementary Data 1

Description: Full list of Pearson and partial correlation coefficients computed for the four Croatian cohorts

File name: Supplementary Data 2

Description: Fisher's exact test p-values for all rule combination in the four Croatian cohorts

File name: Supplementary Data 3

Description: Detailed results of the GWAS analysis for the four IgG glycosyltransferases

File name: Supplementary Data 4

Description: Enzymatic assays for B4GalT1 and MGAT3

File name: Supplementary Software

Description: GGMs for the four Croatian cohorts
